# Supplementary material for: Rheological scaling of ionic-liquid-based polyelectrolytes in ionic liquid solutions: the effect of the ion diameter of ionic liquids
Source: Royal Society of Chemistry journal article supplement (doi:10.1039/d2sm00484d), 2022-01-01
Supplement: d2sm00484d1.pdf [file d2sm00484d1.pdf]

**(Supporting Information)**  
**Rheological Scaling of Ionic Liquid-Based  
Polyelectrolytes in Ionic Liquid Solutions: The Effect  
of the Ion Diameter of Ionic Liquids**

Atsushi Matsumoto<sup>a,b</sup> and Amy Q. Shen<sup>a</sup>

<sup>a</sup>Micro/Bio/Nanofluidics Unit, Okinawa Institute of Science and Technology Graduate  
University

<sup>b</sup>Department of Applied Chemistry and Biotechnology, Graduate School of Engineering,  
University of Fukui

# S1 Molecular weight measurements

We estimated the weight-average molecular weight  $M_w$  of the synthesized PC<sub>4</sub>-TFSI from a Debye plot, obtained through static light scattering measurements using a light scattering spectrometer (Zetasizer Nano ZSP, Malvern Panalytical Ltd.). In the Debye plot, the value of  $M_w$  is estimated by fitting the experimental data with the following equation:

$$\frac{Kc}{R_\theta} = \frac{1}{M_w P(\theta)} + 2A_2c, \quad (\text{S1})$$

where  $c$ ,  $R_\theta$ ,  $P(\theta)$ , and  $A_2$  are the mass concentration of polymers, the excess Rayleigh ratio, the form factor, and the second virial coefficient. Here  $K = \frac{4\pi^2 n^2}{N_A \lambda_0^4} \left(\frac{dn}{dc}\right)^2$  is the optical constant, where  $N_A$ ,  $n$ , and  $\lambda_0 = 633$  nm are the Avogadro constant, the refractive index of the solution, and the wavelength of incident light. In our experiments, the value of  $R_\theta$  at a scattering angle of  $175^\circ$  was measured while the mass concentration of PC<sub>4</sub>-TFSI was varied from 1 g/L to 8 g/L, dissolved in DMF mixed with 0.5 M of Li-TFSI. The refractive index increment  $\frac{dn}{dc} = 0.0263$  mL g<sup>-1</sup> was estimated from Fig. S1 obtained by using a refractometer (RA-130, Kyoto Electronics Manufacturing Co., Ltd.). We observed a linear dependence of the measured  $\frac{Kc}{R_\theta}$  on  $c$  and estimated the weight-average molecular weight of PC<sub>4</sub>-TFSI as  $M_w = 1.27 \times 10^6$  g mol<sup>-1</sup>, see Fig. S2. The degree of polymerization  $N$  was then estimated as  $N = 2944$  since the molar mass of the PC<sub>4</sub>-TFSI repeating unit is 431.43 g mol<sup>-1</sup>.

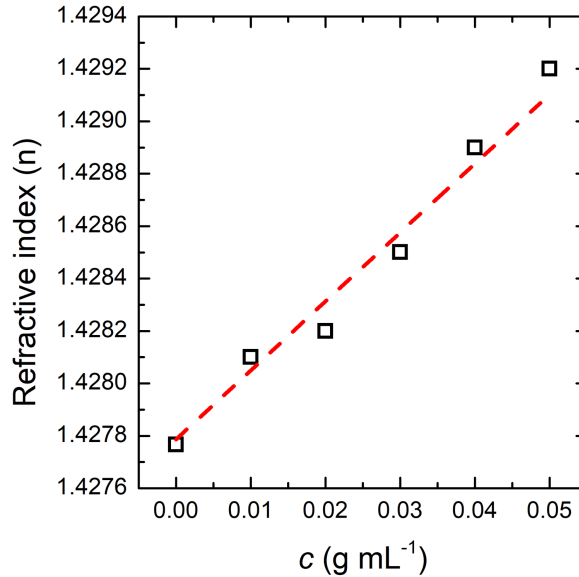

Figure S1: The dependence of the refractive index at room temperature on the mass concentration  $c$  of PC<sub>4</sub>-TFSI for the mixture of PC<sub>4</sub>-TFSI and DMF containing 0.5 mol L<sup>-1</sup> of Li-TFSI. The red-dashed line represents the linear fit to the measured refractive index with an estimated slope of  $\partial n/\partial c = 0.0263$  mL g<sup>-1</sup>.

Here, we should note that the estimated  $M_w$  of the PC<sub>4</sub>-TFSI may have an uncertainty in magnitude due to the following two reasons. First, we measured the values of  $n$  using PC<sub>4</sub>-TFSI solutions without further pre-treatment, such as an extensive dialysis against

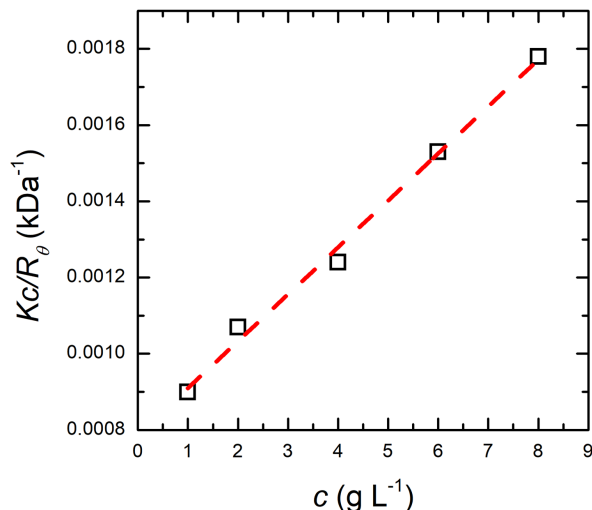

Figure S2: The dependence of  $\frac{Kc}{R_\theta}$  on  $c$  for the synthesized PC<sub>4</sub>-TFSI dissolved in DMF with 0.5 M of Li-TFSI. In the plot, we used  $\frac{dn}{dc} = 0.0263 \text{ mL g}^{-1}$  to estimate the value of the optical constant  $K$ .

the solvent [1], to match the chemical potential of the added salt between the pure solvent and the polyelectrolyte solution. With this mismatch of the salt chemical potential, Schweins et al. [1] showed that the value of  $\frac{dn}{dc}$  became larger than that obtained with the pre-treatment. This is because an unequal distribution of salt ions in polyelectrolyte solutions creates further optical contrast of the dissolved polyelectrolyte chains and thus increases the refractive index. Therefore, the dependence of  $\frac{Kc}{R_\theta}$  on  $c$ , shown in Fig. S2, may be shifted downward. In this case, the intercept value of the fitted curve in Fig. S2 becomes smaller, i.e., the value of  $M_w$  becomes larger, based on eqn (S1). Second, we assumed  $P(\theta) = 1$  when estimating the  $M_w$  based on eqn (S1). However, this assumption is only valid when the polymer molecular weight is sufficiently small, whereas the value of  $P(\theta)$  for high-molecular-weight polymer samples becomes smaller than unity [2]. If this scenario was applicable to our system, the obtained value of  $M_w$  from Fig. S2 would become smaller. Nevertheless, since the estimated molecular weight of the PC<sub>4</sub>-TFSI is sufficiently large, any potential effects on the polymer dynamics, originated from chain ends, can be neglected.

## S2 Supporting figure and table

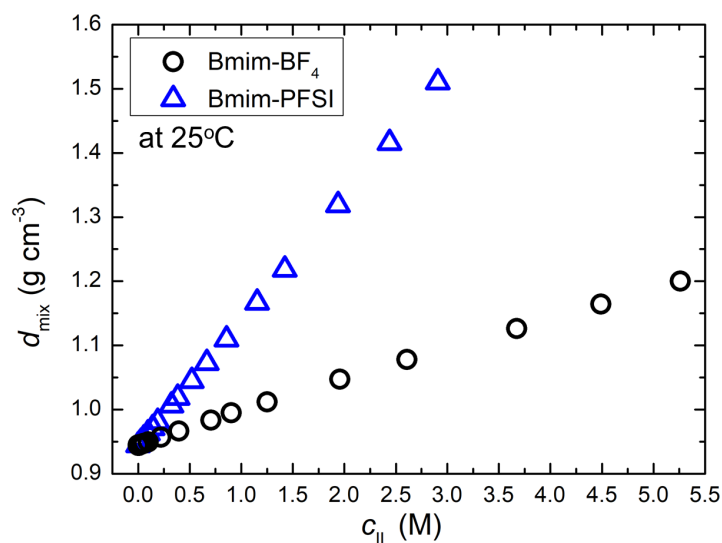

Figure S3: The density  $d_{mix}$  at 25° is plotted as a function of the ionic liquid concentration  $c_{IL}$  for Bmim-BF<sub>4</sub> (black circles) and Bmim-PFSI (blue triangles) solutions in DMF.

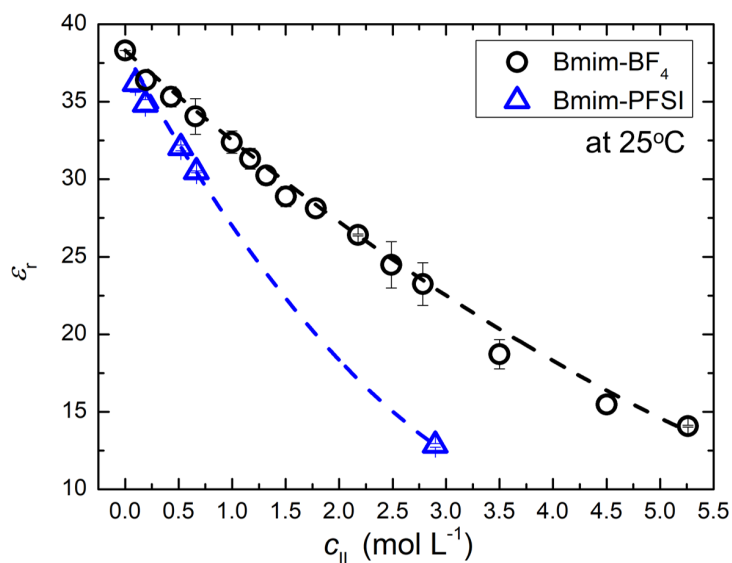

Figure S4: The relative dielectric constant  $\epsilon_r$  at 25°C is plotted as a function of the ionic liquid concentration  $c_{IL}$  for Bmim-BF<sub>4</sub> (black circles) and Bmim-PFSI (blue triangles) solutions in DMF. The dashed lines represent the best curve fit to the measured  $\epsilon_r$ , obtained using a quadratic function of  $\epsilon_r = \epsilon_{DMF} + Ac_{IL} + Bc_{IL}^2$ . The corresponding best fitting coefficients are  $A = -6.05 \pm 0.06 \text{ mol}^{-1} \text{ L}$  and  $B = 0.262 \pm 0.02 \text{ mol}^{-2} \text{ L}^2$  for the mixture of Bmim-BF<sub>4</sub> and DMF,  $A = -12.65 \pm 0.26 \text{ mol}^{-1} \text{ L}$  and  $B = 1.33 \pm 0.10 \text{ mol}^{-2} \text{ L}^2$  for the mixture of Bmim-PFSI and DMF.

## References

- [1] R. Schweins, J. Hollmann, and K. Huber, “Dilute solution behaviour of sodium polyacrylate chains in aqueous nacl solutions,” *Polymer*, vol. 44, no. 23, pp. 7131–7141, 2003.
- [2] M. Rubinstein and R. H. Colby, *Polymer Physics*. Oxford University Press: New York, 2003.
